1 **HIV reservoir size is determined prior to ART initiation and linked to CD8 T cell**  
2 **activation and memory expansion**

3 Genevieve E Martin<sup>1</sup>, Matthew Pace<sup>1</sup>, Freya Shearer<sup>2</sup>, Eva Zilber<sup>1</sup>, Jacob Hurst<sup>1</sup>, Jodi  
4 Meyerowitz<sup>1</sup>, John P Thornhill<sup>1,3</sup>, Julianne Lwanga<sup>4</sup>, Helen Brown<sup>1</sup>, Nicola Robinson<sup>1</sup>,  
5 Emily Hopkins<sup>1</sup>, Natalia Olejniczak<sup>1</sup>, Nneka Nwokolo<sup>5†</sup>, Julie Fox<sup>4,6†</sup>, Sarah Fidler<sup>3,7†</sup>,  
6 Christian B Willberg<sup>1,8†</sup>, and John Frater<sup>1,8†\*</sup> on behalf of the CHERUB investigators

7 <sup>1</sup> Peter Medawar Building for Pathogen Research, Nuffield Department of Medicine, University  
8 of Oxford, Oxford, UK

9 <sup>2</sup> Big Data Institute, Li Ka Shing Centre for Health Information and Discovery, University of  
10 Oxford, Oxford, UK

11 <sup>3</sup> Division of Medicine, Wright Fleming Institute, Imperial College, London, UK

12 <sup>4</sup> Department of Genitourinary Medicine and Infectious Disease, Guys and St Thomas' NHS  
13 Trust, London, UK

14 <sup>5</sup> Chelsea and Westminster Hospital, London, UK

15 <sup>6</sup> King's College NIHR Biomedical Research Centre, London, UK

16 <sup>7</sup> Imperial College NIHR Biomedical Research Centre, London, UK

17 <sup>8</sup> National Institute of Health Research Biomedical Research Centre, Oxford, UK

18

19 †These authors contributed equally

20 *Current affiliations:*

21 Genevieve E Martin: Alfred Hospital, Melbourne, Australia

22 Freya Shearer: Modelling and Simulation Unit, School of Population and Global Health,  
23 University of Melbourne, Melbourne, Australia

24

25 **\*Corresponding author:**

26 John Frater, Nuffield Department of Medicine, Peter Medawar Building for Pathogen

27 Research, John Radcliffe Hospital, Oxford, UK.

28 Email: [john.frater@ndm.ox.ac.uk](mailto:john.frater@ndm.ox.ac.uk)

29

30 **Conflict of interest statement:** The authors have declared that no conflict of interest

31 exists

32 **Abstract**

33 Initiation of antiretroviral therapy (ART) in early compared with chronic HIV infection is  
34 associated with a smaller HIV reservoir. This longitudinal analysis of 63 individuals who  
35 commenced ART during primary HIV infection (PHI) investigates which pre- and post-  
36 therapy factors associate most closely with reservoir size (HIV DNA) following  
37 treatment initiation during PHI. The best predictor of reservoir size at one-year was pre-  
38 ART HIV DNA which was in turn significantly associated with CD8 memory  
39 differentiation (effector memory, naïve and T-bet<sup>neg</sup>Eomes<sup>neg</sup> subsets), CD8 T cell  
40 activation (CD38 expression) and PD-1 and Tim-3 expression on memory CD4 T cells.  
41 No associations were found for any immunological variables following one-year of ART.  
42 HIV reservoir size is determined around the time of ART initiation in individuals treated  
43 during PHI. CD8 T cell activation and memory expansion are linked to HIV reservoir  
44 size, suggesting the importance of the initial host-viral interplay in eventual reservoir  
45 size.

## 46 **Introduction**

47 HIV persists despite long-term suppressive antiretroviral therapy (ART) in a reservoir of  
48 latently infected cells (1-3). Reducing the size of this reservoir is a focus of curative  
49 interventions as a smaller HIV reservoir is associated with delayed clinical progression  
50 and viral rebound following treatment interruption (4-6).

51 While there are only a few studies that explore the longitudinal formation of the HIV  
52 reservoir, there is some evidence that T cell immunity prior to the start of ART may be  
53 key. In the SPARTAC trial, both pre-therapy CD4 and CD8 T cell responses, as well as  
54 protective HLA class I alleles, were linked with lower levels of HIV DNA (7).

55 Additionally, recent work from a different cohort treated during acute infection showed  
56 that HIV-specific T cell responses could reduce viral load (VL), and limit reservoir  
57 seeding, when antiretroviral therapy (ART) was initiated at peak viraemia (8).

58 T cell activation – a mediator of disease progression and non-AIDS co-morbidities (9-12)  
59 – has also been shown in cross-sectional studies to be related to HIV reservoir size (7, 13-  
60 15). Two recent longitudinal studies aimed to clarify this relationship. In individuals who  
61 initiated ART during chronic infection, no link between pre-ART  
62 inflammation/activation was observed with reservoir size over time (16). Contrasting  
63 with this, the finding that several soluble biomarkers in acute infection, including many  
64 linked to interferon- $\alpha$  (IFN- $\alpha$ ) signalling, were identified as correlates of subsequent  
65 reservoir size (17) suggests a link between early immune activation and the formation of  
66 the reservoir.

67 Immune checkpoint receptor (ICR) expression has also been linked to the size of the HIV  
68 reservoir (7, 13, 14, 18, 19). A limitation of many of these studies is that ICR expression  
69 has often been measured on bulk T cells. The HIV reservoir is preferentially found in  
70 memory subsets (19-22) which also express higher levels of ICRs (18, 23-26). As such,  
71 ICR expression on bulk T cell subsets could be a surrogate for altered memory  
72 distribution and a potential confounder (27). Furthermore, many of these relationships  
73 were demonstrated for a single marker, even though the expression of many ICRs is  
74 closely related to one another – and also to T cell activation (23-26, 28-31).

75 The ‘HIV Reservoir Targeting with Early Antiretroviral Therapy’ (HEATHER) cohort is  
76 a prospective study of individuals commencing ART during primary HIV infection  
77 (PHI), and provides the opportunity to study reservoir dynamics over time in well-  
78 characterised participants. Here, we define the relationship of several key immunological  
79 and clinical parameters with the size of the HIV reservoir and show that the key events in  
80 setting the reservoir occur early, prior to starting ART.

81

## 82 **Results**

### 83 *Baseline clinical characteristics*

84 We studied 63 individuals enrolled in HEATHER, a longitudinal observational cohort of  
85 more than 300 participants who commenced ART during PHI. Individuals were selected  
86 based on availability of samples and access to clinical records at the time of the study.

87 Clinical and demographic details are listed in Table 1. All were male and had a median

88 age of 36 (IQR 28-41) years at the time of ART start. They commenced ART a median of  
89 29 (IQR 14-46) days following a confirmed HIV diagnosis and a median of 49 (IQR 33-  
90 90) days following estimated seroconversion. Different methods for diagnosing PHI  
91 (Table 1) were used; 26 participants (41%) were P24 antigen positive without detectable  
92 antibodies, consistent with Fiebig stages I or II at the time of diagnosis.

93 The participants had a high median baseline VL (5.5 log<sub>10</sub> copies/ml; IQR 4.6-6.5), which  
94 declined on ART (Fig. 1A). 60/63 (95%) were virologically suppressed (<50 copies/ml)  
95 after one year of ART (the frequency of viral load sampling and time to suppression is  
96 shown in Supplementary Fig. 1). The three individuals who had not achieved VL<50  
97 copies/ml by one year had estimated VLs (average of those either side of the 1 year time-  
98 point) of 40, 76 and 190 copies/ml, and achieved undetectability shortly after. The  
99 dynamics of CD4 and CD8 count, as well as CD4 to CD8 ratio following ART initiation  
100 are shown in Fig. 1B-D.

101 There was a relationship between the first measured (or ‘baseline’) pVL and the method  
102 used to diagnose PHI (Fig. 1E). Baseline VL was higher when measured closer to  
103 estimated seroconversion ( $r_s=-0.58$ ,  $p=5.0 \times 10^{-7}$ ), suggesting that viral load is of limited  
104 utility as a predictive variable in PHI compared with chronic HIV infection, as a stable  
105 ‘set point’ has not yet been reached.

106

107 *HIV reservoir size after one year of ART is predicted by pre-ART HIV DNA levels*

108 Quantitation of total HIV DNA (copies per  $10^6$  CD4 T cells) is used here as the surrogate  
109 measure of reservoir size on ART. Other measures (e.g. integrated HIV DNA, cell-  
110 associated RNA, quantitative viral outgrowth) were not used for this analysis due to the  
111 high numbers of predictive variables being tested. Of note, the term “reservoir” is only  
112 used for HIV DNA measurements on suppressive ART as pre-ART DNA measurements  
113 will capture cells with active viral replication. Compared with pre-ART levels, HIV DNA  
114 decreased a mean of 0.9  $\log_{10}$  copies following one year of therapy (Fig. 2A;  $p=2.2 \times 10^{-16}$ ). HIV DNA levels pre-therapy and following one year of ART were highly correlated  
115 (Fig. 2B;  $r=0.76$ ,  $p=1.2 \times 10^{-12}$ ). For a subset of 18 individuals, levels of total HIV DNA  
116 were also available three years post-ART initiation, and had declined a further 0.3  $\log_{10}$   
117 copies since year one. (HIV DNA levels were also correlated between those two  
118 measurements (Supplementary Fig. 2;  $r=0.57$ ,  $p=0.013$ )).

120

121 *Immunological and clinical variables associated with HIV DNA are highly correlated*

122 We next determined which clinical and immunological variables were most closely  
123 associated with the size of the HIV reservoir. Clinical variables included CD4 count,  
124 CD8 count, VL, CD4:CD8 ratio, time to ART start, and time to VL suppression on ART.  
125 Immunological measures included flow cytometric quantitation (Fig. 3A) of CD4 and  
126 CD8 memory subsets, CD38 expression, ICR expression (PD-1, TIGIT, Tim-3 on  
127 memory CD4 and CD8 T cells), the proportion of T-bet/Eomes expressing CD8  
128 populations (32) and soluble plasma ICRs (sPD-1 and sTim-3).

129 Several parameters were highly correlated with HIV DNA. Corrgrams were used as a  
130 screen to explore the relationship of variables measured prior to ART initiation (baseline;  
131 Fig. 3B) and after one year of ART (Fig. 3C), with the HIV reservoir at one year. Each  
132 row or column in the corrgram represents a different variable ordered by the strength of  
133 the correlation with reservoir size at one year (in the top left corner). A circle indicates a  
134 correlation between two variables ( $p < 0.05$ ), the size and intensity corresponding to the  
135 magnitude of the correlation coefficient. Variables with a statistically significant  
136 relationship with reservoir size at 1 year are marked by a green square.

137 Two important observations can be made. Firstly, the corrgrams for variables at baseline  
138 and one year look very different (Figs. 3B, C). When exploring variables measured  
139 immediately prior to ART initiation, we can see that those variables which were most  
140 closely related to reservoir size (top left hand corner) were also highly correlated with  
141 each other. Not surprisingly, the variable with the strongest correlation with HIV  
142 reservoir size at one year was the level of HIV DNA measured at baseline. However, 26  
143 other variables are associated with the reservoir and/or each other (green box).

144 When using variables measured after one year of ART – at the same time as the HIV  
145 reservoir was measured (Fig. 3C) – there is little evidence of any correlation with  
146 reservoir size or between variables. These data suggest that certain clinical and  
147 immunological variables are the key determinants of the HIV DNA level just prior to  
148 ART initiation, which is, in turn, the main predictor of HIV reservoir size on ART.

149

150 *CD8 T cell activation and memory expansion are the key determinants of HIV DNA levels*

151 To more formally assess the strength and independence of these relationships, regression  
152 models were fitted to the data. Correlative analyses reinforced the role for baseline total  
153 HIV DNA as the key predictor of reservoir size at one year. For this reason, we  
154 concentrated on models to assess which variables were most highly related with baseline  
155 total HIV DNA (Fig. 4A).

156 The dataset poses several challenges in the fitting of multivariable regression models,  
157 especially as 8.4% of observations are missing (Supplementary Fig. 3) due to unavailable  
158 samples, poor sample viability or low cell count. The large number of parameters  
159 measured relative to observations, as well as the strong correlations between many of  
160 these variables, was also problematic. To ensure the robustness of any conclusions, two  
161 different models (boosted regression tree (BRT) and least absolute shrinkage and  
162 selection operator (LASSO)) with different approaches to complex data were fitted and  
163 their outputs compared.

164 BRT is a machine learning approach that builds a series of regression trees, with each  
165 subsequent tree iteratively aiming to improve the previous fit by focusing on data poorly  
166 modelled by the existing set of trees. This approach is able to handle missing data, does  
167 not make prior assumptions about the effect of potential predictor variables and can  
168 handle high-dimensional interactions (33). A BRT model was fitted with baseline total  
169 HIV DNA as the outcome, and all other baseline variables as predictors. The relative  
170 importance of each predictor variable included in this BRT model is shown in Fig. 4B.  
171 The relative influence of each variable is estimated based on the number of times that  
172 variable is selected for splitting and the improvement to the model as a result of that split  
173 averaged across all trees; a higher number indicates a greater effect of the variable. We



174 defined influential predictors as those with a relative influence value greater than 100  
175 divided by the total number of variables (indicated by the dashed line). The figure shows  
176 that 10 of the 62 predictors had a consistent influence in predicting baseline reservoir  
177 size. Notably, CD8 memory subsets (the proportion of EM and naïve cells), as well as  
178 CD8 CD38 expression were the variables with the highest relative influence.

179 LASSO is a multivariable regression designed to cope with multi-collinearity and large  
180 numbers of predictors by adding a penalty to the coefficient of each term (with the ability  
181 to penalise coefficients to zero) thus performing variable selection. Missing values were  
182 imputed using a random forest based method. Linear LASSO models were fitted to the  
183 data (Fig. 4C) and selected six variables which were independently predictive of baseline  
184 HIV DNA. All six were also selected by the BRT model. The variables with greatest  
185 influence on baseline HIV DNA were associated with CD8 memory expansion (the  
186 proportion of naïve and EM, as well as T-bet<sup>neg</sup>Eomes<sup>neg</sup> CD8 T cells) and CD4 memory  
187 ICR expression (PD-1 on TM and Tim-3 on CM CD4 T cells), as well as CD38  
188 expression on CD8 T cells.

189 A sensitivity analysis was conducted by constructing the same model using only  
190 observations that were complete (no imputation). The overall results of this model were  
191 the same (although due to decreased power fewer variables were selected) and are shown  
192 in Supplementary Table 1.

193

194 *HIV DNA pre-ART is the dominant predictor of reservoir size at one year on ART*

195 Having established which variables were related to baseline HIV DNA, regression  
196 models were then fitted to explore if any of clinical or immunological variables had  
197 additional, independent relationships with reservoir size at one year. Total HIV DNA at  
198 baseline was the most influential variable when combined with other pre-ART or one  
199 year variables (Table 2; Supplementary Fig. 4 shows the corresponding BRT models and  
200 Supplementary Table 1 the LASSO models with no imputation).

201 No immunological variables measured at one year impacted reservoir size independently  
202 of the baseline HIV DNA levels, consistent with the modest correlations observed in the  
203 Fig. 3C corrgram (Model B in Table 2, Supplementary Fig. 4B). Of the clinical variables  
204 and immunological variables measured at baseline, only ‘time from ART start to VL  
205 suppression’ influenced reservoir size independently of the baseline HIV DNA (Model A  
206 in Table 2, Supplementary Fig. 4A).

207

208 *Reservoir size is related to HLA class I*

209 Although we did not have access to HIV-specific immune responses for HEATHER,  
210 participants were typed for HLA class I. These alleles have the strongest consistent  
211 relationship with viral control during HIV infection, and HLA type can be considered as  
212 a surrogate marker of potential CD8-driven HIV-specific immunity (34, 35). Figure 5  
213 shows the relationship between HLA class I alleles and total HIV DNA at one year post-  
214 ART initiation. Alleles associated with viral control (red) can be seen clustering towards  
215 the left hand side of the plot associated with low HIV DNA levels. The converse is seen  
216 for alleles associated with progression (blue). The same relationship was observed with

217 baseline HIV DNA (data not shown) and supports previous findings in a different PHI  
218 cohort (SPARTAC) (7). Together, these data are consistent with HIV specific immunity,  
219 the general immune landscape and clinical parameters all contributing to the size of the  
220 HIV reservoir on ART.

221

222 Figure 6 summarises our findings. The only two independent variables that predicted  
223 HIV reservoir size after one year of ART were total HIV DNA at pre-therapy baseline  
224 and the time taken to achieve viral load suppression after starting therapy. Baseline HIV  
225 DNA was associated with HLA class I type and specific markers of T cell activation,  
226 expansion and exhaustion.

227

## 228 **Discussion**

229 This work demonstrates the importance of immunological events before ART initiation in  
230 determining the subsequent reservoir size. The level of HIV DNA prior to ART was the  
231 most important predictor of reservoir size a year later, suggesting that reservoir size is  
232 “set” early on. Of note, the level of HIV DNA pre-ART was more closely related to CD8  
233 T cell activation, memory expansion and CD4 ICR expression than any clinical  
234 parameters, including pre-ART VL. Several of the associations with reservoir size  
235 presented here have been observed previously – but generally in isolation. This is the first  
236 study to define the independence of relationships between T cell activation, memory  
237 expansion and ICR expression with eventual reservoir size.

238 One of the key findings of this analysis is that the HIV DNA level prior to ART initiation  
239 was the most influential predictor of subsequent reservoir size. Several other studies have  
240 shown a relationship between pre-therapy HIV DNA levels and those once virologically  
241 suppressed on ART (16, 36, 37). These findings also support previous research  
242 suggesting that set point HIV DNA levels in untreated individuals are reached shortly  
243 after peak VL (38), and extend it to show that this is true even if ART is started early.

244 Higher levels of initial T cell activation were associated with increased reservoir size.  
245 This is consistent with the SPARTAC study where CD38 expression at baseline was  
246 significantly associated with total HIV DNA at that time (7). It is possible that this is  
247 driven by higher initial viral burden; it could also reflect poorer CD8 effector function  
248 suggesting that activation and dysfunction may already be coupled during PHI. A recent  
249 study of soluble biomarkers during acute infection demonstrated that several of these  
250 were related to HIV reservoir size (also measured by total HIV DNA) prior to and  
251 following 96 weeks of ART, independently of VL (17). The soluble biomarkers identified  
252 can all be produced by myeloid cells in response to IFN- $\alpha/\gamma$  signalling; the authors  
253 speculate that this could indirectly reflect innate and/or T cell responses to viral  
254 replication (17). The analysis presented here supports these findings, and directly  
255 demonstrates a link between T cell activation and reservoir size.

256 Cross-sectional studies of primary and chronic HIV infection have shown relationships  
257 between contemporaneous HIV DNA and CD8 T cell activation during ART (13, 15, 39),  
258 although this has not been consistently demonstrated (37, 40). Such a link between CD8  
259 activation following ART and HIV DNA levels was not observed here. Of note, in this  
260 work CD38 expression was used to define activation and most prior studies have used

261 HLA-DR/CD38 co-expression. Work from Cockerham *et al.* suggests that HIV DNA  
262 may only relate to HLA-DR and not CD38 expression (15) and could explain this  
263 discrepancy.

264 Gandhi *et al.* observed a relationship between T cell activation during chronic infection  
265 and HIV DNA in individuals commencing treatment at this time (16). Unlike in early  
266 infection studies ((17) and this analysis), this relationship did not persist following  
267 adjustment for baseline VL - suggesting time-dependent differences in the relative  
268 influence of baseline VL and T cell activation as predictors.

269 It is interesting to note that the VL was only modestly correlated with baseline HIV  
270 DNA, as we had hypothesised that these would be closely linked. Indeed, VL was not a  
271 significant predictor here. Several studies have demonstrated a relationship between pre-  
272 therapy VL and HIV DNA (16, 37, 41-44). Notably, many of these studies included  
273 individuals treated during chronic infection, where the VL will have reached set point. In  
274 contrast, during PHI the viral load is substantially more labile. Within this cohort there  
275 was a link between baseline VL and the time after estimated seroconversion that this was  
276 measured (Fig. 1E), whereby individuals with more recent seroconversion had a higher  
277 VL. This has also been observed in another PHI cohort with similar time since infection  
278 (45) and suggests that VL measures taken over this time capture the decline from peak,  
279 rather than a steady state. Within HEATHER there is some variation in the time interval  
280 between when baseline VL and HIV DNA were measured (median 16 days; range 0-82  
281 days). Both of these factors may contribute to the relatively weak relationship between  
282 VL and baseline HIV DNA observed here.

283 It is also possible that the overall pre-ART viral burden (both duration and magnitude of  
284 viraemia) influences HIV reservoir size, and is poorly captured by a single measurement  
285 during PHI. Indeed, the consistent observation that earlier ART limits reservoir size, even  
286 over the short time periods between the first three Fiebig stages (8, 36) implies a role for  
287 the total pre-therapy viral burden. Two findings here suggest an influence of viral burden  
288 on overall reservoir size. The first is the previously reported relationship between HLA  
289 class I alleles and HIV reservoir size (7), which was confirmed. The well-characterised  
290 relationship between HLA class I alleles and VL is mediated via CD8 T cell killing of  
291 virally infected cells; stronger CD8 responses could result in smaller HIV reservoir size  
292 by both limiting seeding (via VL reduction) and contributing to decay of the pool of  
293 infected cells. The second relevant finding is the observation that time to viral load  
294 suppression had an influence on reservoir size independently of baseline HIV DNA level.  
295 This may be because individuals with longer time to VL suppression may have a window  
296 following ART initiation for reservoir seeding to continue. Alternatively, slower time to  
297 viral suppression may reflect higher pre-therapy viral burden not captured in the baseline  
298 VL measurement. Whilst most individuals commenced ART at or shortly after their  
299 baseline visit (median 0 days, 82% within 1 week), a small proportion had a larger  
300 interval between these (maximum 48 days) providing additional time for reservoir  
301 seeding not captured in the baseline HIV DNA measurement.

302 It is notable that the two measures of ICR expression which related to reservoir size were  
303 measured on TM and CM CD4 T cells, the subsets most enriched for proviral DNA (19-  
304 22). Several cross-sectional studies have shown a relationship between PD-1 expression  
305 on bulk CD4 T cells during ART and overall reservoir size (13, 14, 18). CM and TM

306 CD4 T cells expressing PD-1 are also enriched for proviral DNA (18, 19). The findings  
307 presented here demonstrate a relationship between PD-1 expression on CM CD4 T cells  
308 supporting these prior observations and showing that this relationship exists during  
309 untreated PHI. Contrasting with prior work, here this relationship did not continue during  
310 ART. It is possible that previous studies, which have measured PD-1 on bulk T cells (13,  
311 14, 18), are actually capturing this shift in memory proportions. This discrepancy could  
312 also be due to differences between individuals who commence ART in primary,  
313 compared with chronic, infection.

314 Whilst a comprehensive analysis of ICR expression, activation and T cell differentiation  
315 was performed, one limitation of this work is that reservoir size was only measured using  
316 total HIV DNA. This measure is clinically relevant as lower levels have been associated  
317 with delayed viral rebound following treatment interruption (4). Much of the HIV  
318 reservoir, however, is not replication competent (46, 47). Whilst total HIV DNA has been  
319 suggested to reflect replication-competent reservoir size in cohort studies (48), this work  
320 has not assessed if there is any impact of these immunological measures on the quality of  
321 proviruses comprising the reservoir. A major strength of this study is its longitudinal  
322 design. It is possible, however, that 1 year of follow up is not sufficient time for ART to  
323 stabilise the HIV reservoir and that these results may not reflect the eventual long-term  
324 reservoir. For individuals for whom samples were available, we have shown that HIV  
325 DNA levels one year following ART initiation correlated with those at three years,  
326 suggesting the validity of this approach. Several other studies have shown relationships  
327 between HIV DNA levels at early time points and those much later after ART initiation  
328 (16, 37, 49), further supporting the use of this time point here.

329 This work has shown that the magnitude of the early immunological insult, reflected in  
330 CD8 T cell activation and memory expansion drives HIV reservoir size. These results  
331 suggest that targeting of host or viral factors which lead to early viral expansion and T  
332 cell activation may be a way of limiting HIV reservoir size, and confirm the importance  
333 of starting ART as early as possible.

334

## 335 **Methods**

### 336 *Participant information*

337 HEATHER is a prospective observational cohort study of individuals who commence  
338 ART (and remain on uninterrupted therapy) within 3 months of the date of HIV diagnosis  
339 during PHI. Individuals are considered to have PHI if they meet any of the following  
340 criteria: HIV-1 positive antibody test within 6 months of a HIV-1 negative antibody test,  
341 HIV-1 antibody negative with positive PCR (or positive P24 Ag or viral load detectable),  
342 RITA (recent incident assay test algorithm) assay result consistent with recent infection,  
343 equivocal HIV-1 antibody test supported by a repeat test within 2 weeks showing a rising  
344 optical density or having clinical manifestations of symptomatic HIV seroconversion  
345 illness supported by antigen positivity. The time of seroconversion was estimated as the  
346 midpoint between the most recent negative or equivocal test and the first positive test for  
347 those who met relevant criteria, the date of RITA test minus 120 days and as the date of  
348 test for all other participants. Individuals with co-existent hepatitis B or C infection are  
349 not eligible for inclusion in HEATHER. Individuals for inclusion in this analysis were  
350 selected at random and based on sample availability.



351 Cryopreserved peripheral blood mononuclear cells (PBMCs) were used from the closest  
352 sample to seroconversion (baseline) and from a sample 9–15 months after  
353 commencement of ART (1 year). CD4 count, CD8 count and VL were measured as part  
354 of routine clinical care with baseline CD4 and CD8 counts defined as the earliest value  
355 prior to the initiation of ART. Similarly, the baseline VL was taken as the earliest value  
356 prior to the initiation of ART. In both cases, usually only one value was available.

357 *Flow cytometry*

358 Cryopreserved PBMCs were thawed in RPMI-1640 medium supplemented with 10%  
359 FBS, L-glutamine, penicillin and streptomycin (R10) containing 2.7 Kunitz units/ml of  
360 DNase (Qiagen). Cells were stained in BD Horizon Brilliant Stain Buffer (BD)  
361 containing all antibodies and Live/Dead Near IR at 1 in 300 dilution (Life Technologies)  
362 at 4°C for 30 minutes.

363 Panel 1 - PBMCs were stained with the following antibodies: CD3 Brilliant Violet (BV)  
364 570 (UCHT1), CCR7 Pacific Blue (G043H7), CD27 AlexaFluor700 (M-T271)[all  
365 BioLegend], CD4 BV605 (RPA-T4), CD8 BV650 (RPA-T8)[all BD], PD-1 PE-  
366 eFluor610 (eBioJ105), CD45RA FITC (HI100), TIGIT PerCP-eFluor710 (MBSA43)[all  
367 eBioscience] and Tim-3 PE (344823)[R&D].

368 Panel 2 - PBMCs were stained with the following antibodies: CD3 BV570, CD38  
369 AlexaFluor700 (HB-7) [BioLegend], CD4 BV605, CD8 BV650, PD-1 PE-eFluor610 and  
370 Tim-3 PE. Following this, cells were washed twice prior to fixation and permeabilisation  
371 with Foxp3 Buffer Set (BD) as per manufacturer's directions with reduced volumes to  
372 facilitate staining in 96-well plates. Staining for intracellular epitopes was performed at

373 room temperature for 30 minutes in PBS containing 0.5% bovine serum albumin (BSA)  
374 and 0.1% sodium azide with the following antibodies: T-bet FITC (4B10)[BioLegend]  
375 and Eomes eFluor660 (WD1928)[eBioscience].

376 For both panels, cells were washed twice, fixed with 2% formaldehyde for 30 minutes,  
377 then washed twice and resuspended in phosphate buffered saline (PBS) for acquisition.

378 All samples were acquired on a LSR II (BD) the day after staining. The same machine  
379 was used for all experiments with daily calibration with Cytometer Setup & Tracking  
380 beads (BD) to maximise comparability between days. Rainbow Calibration Particles  
381 (BioLegend) were also used for cohort phenotyping to minimise batch-to-batch  
382 variability. Data were analysed using FlowJo Version 10.8.0r1 (Treestar).

### 383 *Soluble PD-1 and Tim-3 quantification*

384 The concentration of sPD-1 and sTim-3 was measured in thawed plasma samples by  
385 enzyme linked immunosorbent assay (ELISA) using Human PD-1 (PDCD1) ELISA kit  
386 [EHPDCD1] (Thermo Fisher Scientific, Waltham, MA USA) and Quantikine ELISA  
387 Human TIM-3 Immunoassay kit [DTIM30] (R&D Systems, Minneapolis, MN USA) as  
388 per manufacturers' instructions at 1:2 and 1:5 dilutions respectively.

### 389 *Total HIV DNA quantification*

390 HIV DNA was quantified relative to cell number using qPCR as previously described  
391 (50). In brief, cryopreserved PBMCs were thawed (as above) and CD4 T cells were  
392 isolated by negative selection using the EasySep Human CD4 Enrichment Kit (Stemcell  
393 Technologies) before DNA extraction with the QiaAMP Blood Mini Kit (Qiagen). Cell

394 copy number was initially quantified using an albumin qPCR. 25,000 cell equivalents  
395 (and no less than 10,000 cell equivalents) of DNA was then used in a total HIV DNA  
396 qPCR, performed in triplicate. The mean number of copies of DNA was normalised to  
397 cell number and expressed as copies/ $10^6$  CD4 T cells.

#### 398 *HLA-typing*

399 HLA typing was performed to intermediate resolution using PCR with sequence specific  
400 primers (PCR-SSP).

#### 401 *Statistics*

402 Analyses were performed using R (v3.2.2 or v3.4.3) and GraphPad Prism (v7.0b). Except  
403 where otherwise specified, p-values <0.05 were considered statistically significant.

404 Simple comparisons were performed using parametric or non-parametric tests as  
405 appropriate and are described alongside the results.

406 Corrgrams were generated using the package corrplot (v0.84). Where some data were  
407 missing, pairwise complete observations were used to calculate the correlation  
408 coefficients.

409 Boosted regression tree models were fitted with a Gaussian outcome using the package  
410 gbm3 (v2.2). Models were fitted with an interaction depth of 5 with a minimum of 5  
411 observations in a terminal node. The shrinkage parameter was adjusted between 0.0001 -  
412 0.001 to aim for optimal number of trees to fall in the range of 3000-10000. The optimal  
413 number of trees was determined using 10 fold cross-validation, with the number of trees

414 that minimised cross-validation error chosen. Results presented are summarised outcomes  
415 of 100 models.

416 LASSO models (51) were fitted using the R package glmnet (v2.0-16) (52). Gaussian  
417 regression models were fitted with an additive linear model (no interactions). The tuning  
418 parameter  $\lambda$  was determined using 10-fold cross-validation, with the  $\lambda$  value used being  
419 that which minimised cross-validation error plus one standard error. Where data were  
420 imputed this was performed using the package MissForest (53), which employs a random  
421 forest based method for multiple imputation and has been shown to be superior to other  
422 multiple imputation methods in biological datasets with comparable levels of missingness  
423 (53, 54).

#### 424 *Study approval*

425 Recruitment for the HEATHER cohort was approved by the West Midlands-South  
426 Birmingham Research Ethics Committee (reference 14/WM/1104). All participants have  
427 given informed consent for their participation in these studies.

428 **Author contributions**

429 GEM, JFr devised the study, analysed data and wrote the manuscript; FS and JH advised  
430 on the analysis of data; GEM, MP, EZ, JT, HB, NR, EH and NO performed laboratory  
431 analyses; JM managed the patient cohorts and collated demographic data; JT, JL, NN,  
432 JFo and SF managed clinical sites and recruitment; NN, JFo, SF, CBW, JFr led on study  
433 design and management.

434 **Acknowledgments**

435 We thank the participants of HEATHER. The HEATHER study is conducted as part of  
436 the CHERUB (Collaborative HIV Eradication of Reservoirs: UK BRC) collaboration.  
437 CHERUB Steering Committee: Andrew Lever (University of Cambridge), Mark Wills  
438 (University of Cambridge), Jonathan Weber (Imperial College, London), Sarah Fidler  
439 (Imperial College, London), John Frater (University of Oxford), Lucy Dorrell (University  
440 of Oxford), Mike Malim (King's College, London), Julie Fox (King's College London),  
441 Ravi Gupta (University College London), Clare Jolly (University College London).  
442 Thank you to the following who have been involved with the recruitment of HEATHER  
443 at the trial sites. Kristin Kuldane, Heather Lewis, Rebecca Hall (St Mary's Hospital),  
444 Teresa Solano (St Thomas' Hospital), Sathya Visvendra, Rhian Bull and Gabriele  
445 Pasluostaite (Chelsea & Westminster Hospital).

446 **Funding:**

447 JFr was supported by the Medical Research Council (Grant no. MR/L006588/1) and the  
448 National Institute of Health Research Oxford Biomedical Research Centre.

449 **References**

- 450 1. Finzi D, Hermankova M, Pierson T, Carruth LM, Buck C, Chaisson RE, et al.  
451 Identification of a reservoir for HIV-1 in patients on highly active antiretroviral  
452 therapy. *Science*. 1997;278(5341):1295-300.
- 453 2. Chun TW, Carruth L, Finzi D, Shen X, DiGiuseppe JA, Taylor H, et al.  
454 Quantification of latent tissue reservoirs and total body viral load in HIV-1  
455 infection. *Nature*. 1997;387(6629):183-8.
- 456 3. Wong JK, Hezareh M, Gunthard HF, Havlir DV, Ignacio CC, Spina CA, et al.  
457 Recovery of replication-competent HIV despite prolonged suppression of plasma  
458 viremia. *Science*. 1997;278(5341):1291-5.
- 459 4. Williams JP, Hurst J, Stohr W, Robinson N, Brown H, Fisher M, et al. HIV-1  
460 DNA predicts disease progression and post-treatment virological control. *Elife*.  
461 2014;3:e03821.
- 462 5. Li JZ, Etemad B, Ahmed H, Aga E, Bosch RJ, Mellors JW, et al. The size of the  
463 expressed HIV reservoir predicts timing of viral rebound after treatment  
464 interruption. *AIDS*. 2016;30(3):343-53.
- 465 6. Sneller MC, Justement JS, Gittens KR, Petrone ME, Clarridge KE, Proschan MA,  
466 et al. A randomized controlled safety/efficacy trial of therapeutic vaccination in  
467 HIV-infected individuals who initiated antiretroviral therapy early in infection.  
468 *Sci Transl Med*. 2017;9(419).
- 469 7. Hurst J, Hoffmann M, Pace M, Williams JP, Thornhill J, Hamlyn E, et al.  
470 Immunological biomarkers predict HIV-1 viral rebound after treatment  
471 interruption. *Nat Commun*. 2015;6:8495.

- 472 8. Takata H, Buranapraditkun S, Kessing C, Fletcher JL, Muir R, Tardif V, et al.  
473 Delayed differentiation of potent effector CD8(+) T cells reducing viremia and  
474 reservoir seeding in acute HIV infection. *Sci Transl Med.* 2017;9(377).
- 475 9. Sousa AE, Carneiro J, Meier-Schellersheim M, Grossman Z, and Victorino RM.  
476 CD4 T cell depletion is linked directly to immune activation in the pathogenesis  
477 of HIV-1 and HIV-2 but only indirectly to the viral load. *J Immunol.*  
478 2002;169(6):3400-6.
- 479 10. Giorgi JV, Hultin LE, McKeating JA, Johnson TD, Owens B, Jacobson LP, et al.  
480 Shorter survival in advanced human immunodeficiency virus type 1 infection is  
481 more closely associated with T lymphocyte activation than with plasma virus  
482 burden or virus chemokine coreceptor usage. *J Infect Dis.* 1999;179(4):859-70.
- 483 11. Deeks SG, Kitchen CM, Liu L, Guo H, Gascon R, Narvaez AB, et al. Immune  
484 activation set point during early HIV infection predicts subsequent CD4+ T-cell  
485 changes independent of viral load. *Blood.* 2004;104(4):942-7.
- 486 12. Uday NS, and Hunt PW. Role of immune activation in progression to AIDS. *Curr*  
487 *Opin HIV AIDS.* 2016;11(2):131-7.
- 488 13. Khoury G, Fromentin R, Solomon A, Hartogensis W, Killian M, Hoh R, et al.  
489 Human Immunodeficiency Virus Persistence and T-Cell Activation in Blood,  
490 Rectal, and Lymph Node Tissue in Human Immunodeficiency Virus-Infected  
491 Individuals Receiving Suppressive Antiretroviral Therapy. *J Infect Dis.*  
492 2017;215(6):911-9.
- 493 14. Hatano H, Jain V, Hunt PW, Lee TH, Sinclair E, Do TD, et al. Cell-based  
494 measures of viral persistence are associated with immune activation and

- 495           programmed cell death protein 1 (PD-1)-expressing CD4+ T cells. *J Infect Dis.*  
496           2013;208(1):50-6.
- 497 15.       Cockerham LR, Siliciano JD, Sinclair E, O'Doherty U, Palmer S, Yukl SA, et al.  
498       CD4+ and CD8+ T cell activation are associated with HIV DNA in resting CD4+  
499       T cells. *PLoS One.* 2014;9(10):e110731.
- 500 16.       Gandhi RT, McMahon DK, Bosch RJ, Lalama CM, Cyktor JC, Macatangay BJ, et  
501       al. Levels of HIV-1 persistence on antiretroviral therapy are not associated with  
502       markers of inflammation or activation. *PLoS Pathog.* 2017;13(4):e1006285.
- 503 17.       Teigler JE, Leyre L, Chomont N, Slike B, Jian N, Eller MA, et al. Distinct  
504       biomarker signatures in HIV acute infection associate with viral dynamics and  
505       reservoir size. *JCI Insight.* 2018;3(10).
- 506 18.       Fromentin R, Bakeman W, Lawani MB, Khoury G, Hartogensis W, DaFonseca S,  
507       et al. CD4+ T Cells Expressing PD-1, TIGIT and LAG-3 Contribute to HIV  
508       Persistence during ART. *PLoS Pathog.* 2016;12(7):e1005761.
- 509 19.       Chomont N, El-Far M, Ancuta P, Trautmann L, Procopio FA, Yassine-Diab B, et  
510       al. HIV reservoir size and persistence are driven by T cell survival and  
511       homeostatic proliferation. *Nat Med.* 2009;15(8):893-900.
- 512 20.       Yukl SA, Shergill AK, Ho T, Killian M, Girling V, Epling L, et al. The  
513       distribution of HIV DNA and RNA in cell subsets differs in gut and blood of  
514       HIV-positive patients on ART: implications for viral persistence. *J Infect Dis.*  
515       2013;208(8):1212-20.
- 516 21.       Josefsson L, von Stockenstrom S, Faria NR, Sinclair E, Bacchetti P, Killian M, et  
517       al. The HIV-1 reservoir in eight patients on long-term suppressive antiretroviral



- 518 therapy is stable with few genetic changes over time. *Proc Natl Acad Sci U S A*.  
519 2013;110(51):E4987-96.
- 520 22. Soriano-Sarabia N, Bateson RE, Dahl NP, Crooks AM, Kuruc JD, Margolis DM,  
521 et al. Quantitation of replication-competent HIV-1 in populations of resting CD4+  
522 T cells. *J Virol*. 2014;88(24):14070-7.
- 523 23. Hoffmann M, Pantazis N, Martin GE, Hickling S, Hurst J, Meyerowitz J, et al.  
524 Exhaustion of Activated CD8 T Cells Predicts Disease Progression in Primary  
525 HIV-1 Infection. *PLoS Pathog*. 2016;12(7):e1005661.
- 526 24. Cockerham LR, Jain V, Sinclair E, Glidden DV, Hartogenesis W, Hatano H, et al.  
527 Programmed death-1 expression on CD4(+) and CD8(+) T cells in treated and  
528 untreated HIV disease. *AIDS*. 2014;28(12):1749-58.
- 529 25. Tauriainen J, Scharf L, Frederiksen J, Naji A, Ljunggren HG, Sonnerborg A, et al.  
530 Perturbed CD8(+) T cell TIGIT/CD226/PVR axis despite early initiation of  
531 antiretroviral treatment in HIV infected individuals. *Sci Rep*. 2017;7:40354.
- 532 26. Yamamoto T, Price DA, Casazza JP, Ferrari G, Nason M, Chattopadhyay PK, et  
533 al. Surface expression patterns of negative regulatory molecules identify  
534 determinants of virus-specific CD8+ T-cell exhaustion in HIV infection. *Blood*.  
535 2011;117(18):4805-15.
- 536 27. Olesen R, Leth S, Nymann R, Ostergaard L, Sogaard OS, Denton PW, et al.  
537 Immune checkpoints and the HIV-1 reservoir: proceed with caution. *J Virus Erad*.  
538 2016;2(3):183-6.
- 539 28. Jones RB, Ndhlovu LC, Barbour JD, Sheth PM, Jha AR, Long BR, et al. Tim-3  
540 expression defines a novel population of dysfunctional T cells with highly

- 541 elevated frequencies in progressive HIV-1 infection. *J Exp Med*.  
542 2008;205(12):2763-79.
- 543 29. Vollbrecht T, Brackmann H, Henrich N, Roeling J, Seybold U, Bogner JR, et al.  
544 Impact of changes in antigen level on CD38/PD-1 co-expression on HIV-specific  
545 CD8 T cells in chronic, untreated HIV-1 infection. *J Med Virol*. 2010;82(3):358-  
546 70.
- 547 30. Bengsch B, Ohtani T, Khan O, Setty M, Manne S, O'Brien S, et al. Epigenomic-  
548 Guided Mass Cytometry Profiling Reveals Disease-Specific Features of  
549 Exhausted CD8 T Cells. *Immunity*. 2018;48(5):1029-45 e5.
- 550 31. Sauce D, Almeida JR, Larsen M, Haro L, Autran B, Freeman GJ, et al. PD-1  
551 expression on human CD8 T cells depends on both state of differentiation and  
552 activation status. *AIDS*. 2007;21(15):2005-13.
- 553 32. Buggert M, Tauriainen J, Yamamoto T, Frederiksen J, Ivarsson MA, Michaelsson  
554 J, et al. T-bet and Eomes are differentially linked to the exhausted phenotype of  
555 CD8+ T cells in HIV infection. *PLoS Pathog*. 2014;10(7):e1004251.
- 556 33. Elith J, Leathwick JR, and Hastie T. A working guide to boosted regression trees.  
557 *J Anim Ecol*. 2008;77(4):802-13.
- 558 34. Pereyra F, Jia X, McLaren PJ, Telenti A, de Bakker PI, Walker BD, et al. The  
559 major genetic determinants of HIV-1 control affect HLA class I peptide  
560 presentation. *Science*. 2010;330(6010):1551-7.
- 561 35. Carrington M, Nelson GW, Martin MP, Kissner T, Vlahov D, Goedert JJ, et al.  
562 HLA and HIV-1: heterozygote advantage and B\*35-Cw\*04 disadvantage.  
563 *Science*. 1999;283(5408):1748-52.

- 564 36. Ananworanich J, Schuetz A, Vandergeeten C, Sereti I, de Souza M, Rerknimitr R,  
565 et al. Impact of multi-targeted antiretroviral treatment on gut T cell depletion and  
566 HIV reservoir seeding during acute HIV infection. *PLoS One*. 2012;7(3):e33948.
- 567 37. Besson GJ, Lalama CM, Bosch RJ, Gandhi RT, Bedison MA, Aga E, et al. HIV-1  
568 DNA decay dynamics in blood during more than a decade of suppressive  
569 antiretroviral therapy. *Clin Infect Dis*. 2014;59(9):1312-21.
- 570 38. Ananworanich J, Chomont N, Eller LA, Kroon E, Tovanabutra S, Bose M, et al.  
571 HIV DNA Set Point is Rapidly Established in Acute HIV Infection and  
572 Dramatically Reduced by Early ART. *EBioMedicine*. 2016;11:68-72.
- 573 39. Yukl SA, Gianella S, Sinclair E, Epling L, Li Q, Duan L, et al. Differences in  
574 HIV burden and immune activation within the gut of HIV-positive patients  
575 receiving suppressive antiretroviral therapy. *J Infect Dis*. 2010;202(10):1553-61.
- 576 40. Poizot-Martin I, Faucher O, Obry-Roguet V, Nicolino-Brunet C, Ronot-  
577 Bregigeon S, Dignat-George F, et al. Lack of correlation between the size of HIV  
578 proviral DNA reservoir and the level of immune activation in HIV-infected  
579 patients with a sustained undetectable HIV viral load for 10 years. *J Clin Virol*.  
580 2013;57(4):351-5.
- 581 41. Fourati S, Flandre P, Calin R, Carcelain G, Soulie C, Lambert-Niclot S, et al.  
582 Factors associated with a low HIV reservoir in patients with prolonged  
583 suppressive antiretroviral therapy. *J Antimicrob Chemother*. 2014;69(3):753-6.
- 584 42. Lambert-Niclot S, Flandre P, Valantin MA, Soulie C, Fourati S, Wirden M, et al.  
585 Similar evolution of cellular HIV-1 DNA level in darunavir/ritonavir

- 586 monotherapy versus triple therapy in MONOI-ANRS136 trial over 96 weeks.  
587 *PLoS One*. 2012;7(7):e41390.
- 588 43. Burgard M, Boufassa F, Viard JP, Garrigue I, Ruffault A, Izopet J, et al. Factors  
589 influencing peripheral blood mononuclear cell-associated HIV-1 DNA level after  
590 long-term suppressive antiretroviral therapy in 236 patients. *AIDS*.  
591 2009;23(16):2165-71.
- 592 44. Hoen B, Cooper DA, Lampe FC, Perrin L, Clumeck N, Phillips AN, et al.  
593 Predictors of virological outcome and safety in primary HIV type 1-infected  
594 patients initiating quadruple antiretroviral therapy: QUEST GW PROB3005. *Clin*  
595 *Infect Dis*. 2007;45(3):381-90.
- 596 45. Trautmann L, Mbitikon-Kobo FM, Goulet JP, Peretz Y, Shi Y, Van Grevenynghe  
597 J, et al. Profound metabolic, functional, and cytolytic differences characterize  
598 HIV-specific CD8 T cells in primary and chronic HIV infection. *Blood*.  
599 2012;120(17):3466-77.
- 600 46. Ho YC, Shan L, Hosmane NN, Wang J, Laskey SB, Rosenbloom DI, et al.  
601 Replication-competent noninduced proviruses in the latent reservoir increase  
602 barrier to HIV-1 cure. *Cell*. 2013;155(3):540-51.
- 603 47. Bruner KM, Murray AJ, Pollack RA, Soliman MG, Laskey SB, Capoferri AA, et  
604 al. Defective proviruses rapidly accumulate during acute HIV-1 infection. *Nat*  
605 *Med*. 2016;22(9):1043-9.
- 606 48. Sharaf R, Lee GQ, Sun X, Etemad B, Aboukhater LM, Hu Z, et al. HIV-1 proviral  
607 landscapes distinguish posttreatment controllers from noncontrollers. *J Clin*  
608 *Invest*. 2018;128(9):4074-85.

- 609 49. Jain V, Hartogensis W, Bacchetti P, Hunt PW, Hatano H, Sinclair E, et al.  
610 Antiretroviral therapy initiated within 6 months of HIV infection is associated  
611 with lower T-cell activation and smaller HIV reservoir size. *J Infect Dis.*  
612 2013;208(8):1202-11.
- 613 50. Jones M, Williams J, Gartner K, Phillips R, Hurst J, and Frater J. Low copy target  
614 detection by Droplet Digital PCR through application of a novel open access  
615 bioinformatic pipeline, 'definetherain'. *J Virol Methods.* 2014;202:46-53.
- 616 51. Tibshirani R. Regression Shrinkage and Selection via the Lasso. *Journal of the*  
617 *Royal Statistical Society Series B (Methodological).* 1996;58(1):267-88.
- 618 52. Friedman J, Hastie T, and Tibshirani R. Regularization Paths for Generalized  
619 Linear Models via Coordinate Descent. *J Stat Softw.* 2010;33(1):1-22.
- 620 53. Stekhoven DJ, and Buhlmann P. MissForest--non-parametric missing value  
621 imputation for mixed-type data. *Bioinformatics.* 2012;28(1):112-8.
- 622 54. Waljee AK, Mukherjee A, Singal AG, Zhang Y, Warren J, Balis U, et al.  
623 Comparison of imputation methods for missing laboratory data in medicine. *BMJ*  
624 *Open.* 2013;3(8).
- 625

626 **Figures**

627 **Figure 1.** Measures of clinical progression during treated primary HIV infection

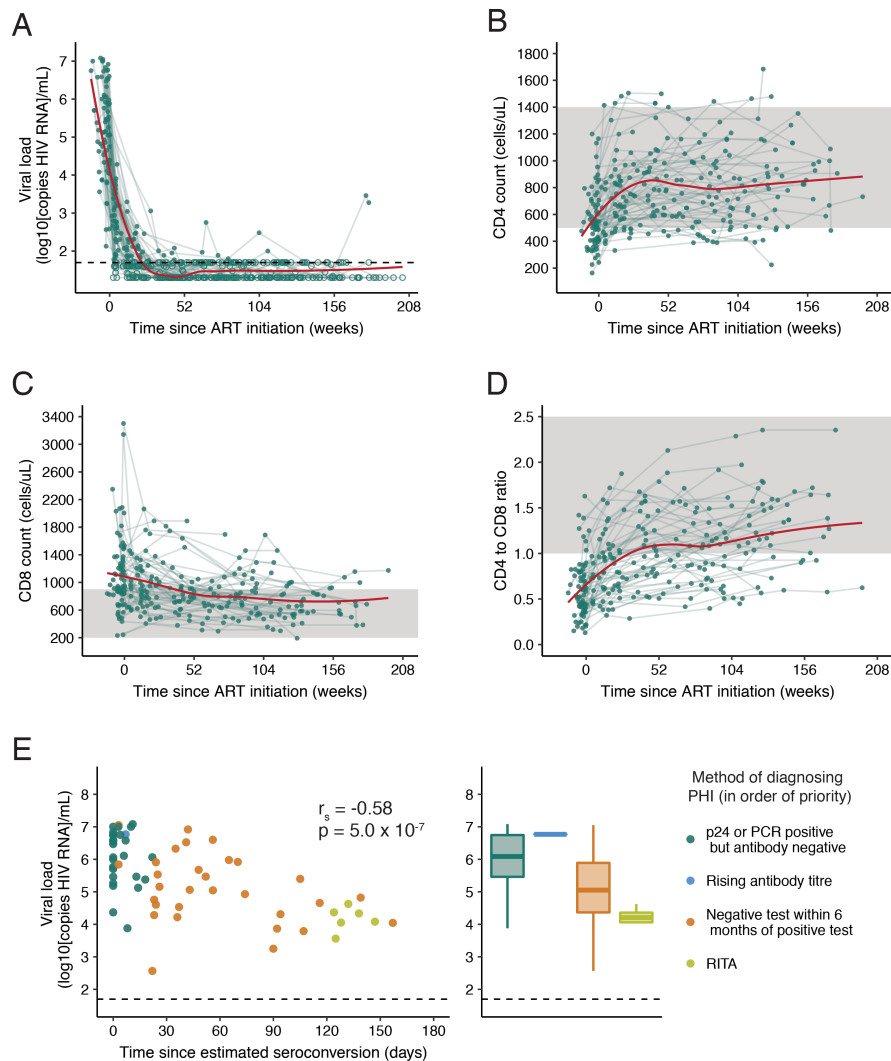

628

629 **(A)** Viral load (VL), **(B)** CD4 count **(C)** CD8 count and **(D)** CD4 to CD8 ratio in the 4 years  
 630 following ART initiation (n=63). A trend line (shown in red) has been fitted using local  
 631 polynomial regression fitting (LOESS) smoothing with an  $\alpha$  value of 0.75. For **(A)** exact values  
 632 are shown as closed circles, and those below the limit of detection are shown as open circles; the  
 633 black dashed line indicates 50 copies/ml. In **(B-D)** the shaded region shows the normal range for  
 634 these parameters. **(E)** Baseline VL relative to the number of days this was measured after  
 635 estimated seroconversion (left panel; Spearman's correlation) with the same data as histograms  
 636 stratified by method of diagnosing PHI (right panel). If individuals met multiple diagnostic  
 637 criteria, they are plotted as the criterion with the most reliability in estimating date of  
 638 seroconversion; these are shown in the legend in the order of priority used.

639 **Figure 2.** Total HIV DNA during treated primary HIV infection

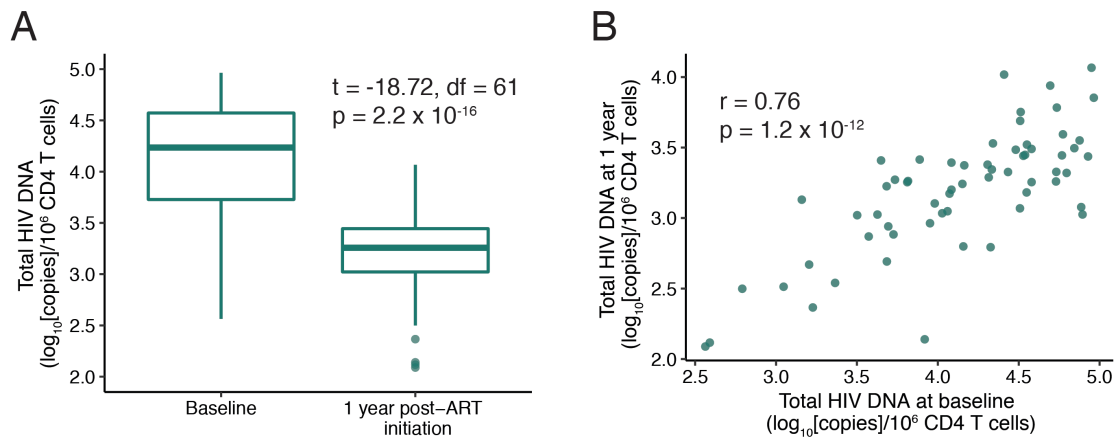

640

641 **(A-B)** Relationship between total HIV DNA measured at baseline and 1 year following ART  
642 initiation (n=62). For **(A)** comparison was made using a paired t-test and in **(B)** a Pearson's  
643 correlation was performed.

644 **Figure 3.** Immunologic and clinical variables associated with HIV reservoir size are  
 645 highly correlated with one another

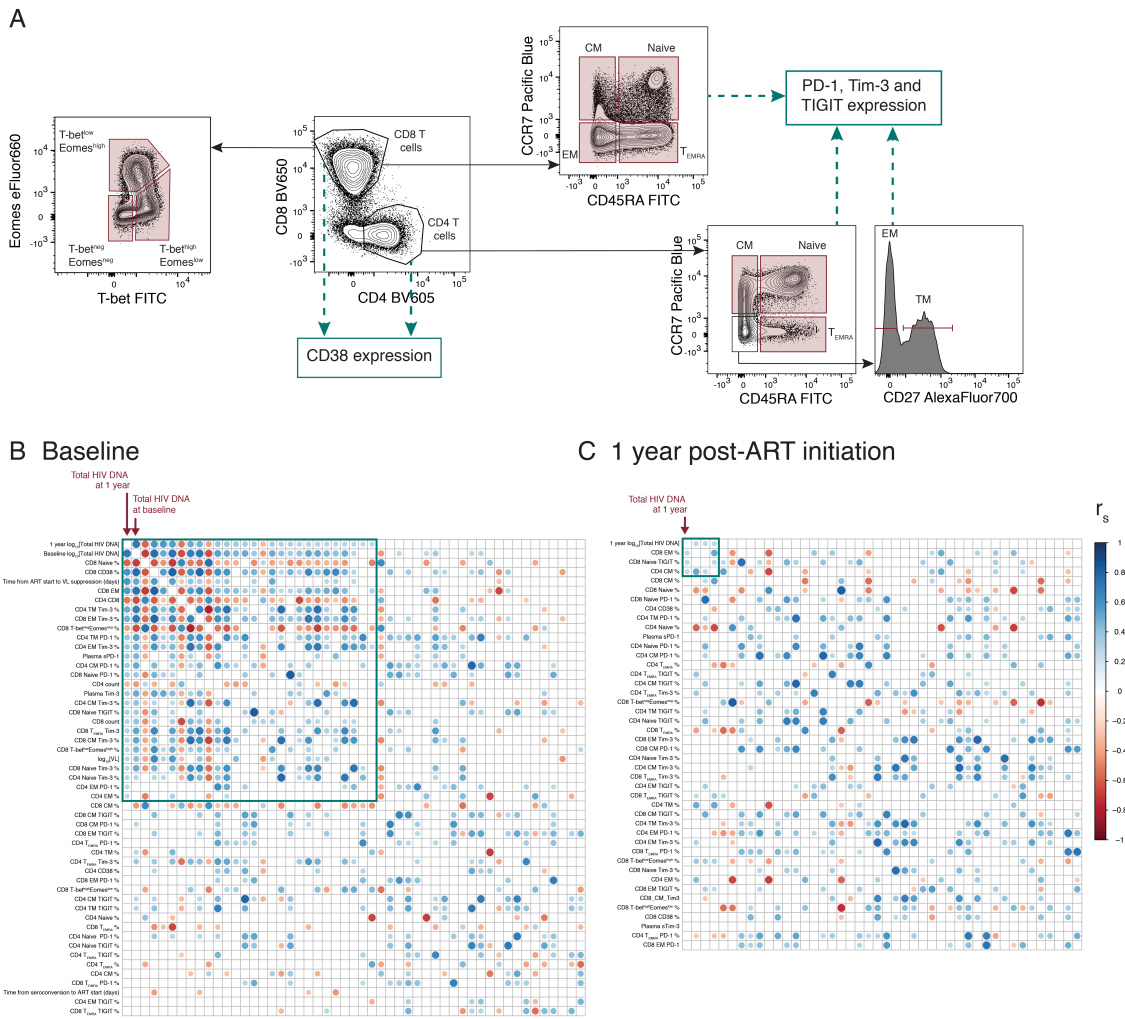

646  
 647 **(A)** Schematic showing the T cell subsets and surface markers measured by flow cytometry in  
 648 this analysis. The frequency of populations gated in red was included in analysis, as well as the  
 649 expression of CD38, PD-1, Tim-3 and TIGIT on populations marked. **(B-C)** shows the  
 650 correlations between clinical/immunological variables and HIV reservoir size. Corplots showing  
 651 the relationship between HIV reservoir size at 1 year (log<sub>10</sub> [Total HIV DNA]) and  
 652 immunological/clinical variables (n=63) measured at baseline **(B)** or following 1 year of ART  
 653 **(C)**. The same immunological variables were included at both time points, and clinical variables  
 654 at baseline only. Reservoir size at 1 year (1 year log<sub>10</sub>[Total HIV DNA]) is shown in the top left  
 655 corner and is marked. For both B and C, variables have been ranked based on the magnitude of  
 656 absolute correlation coefficient with 1 year log<sub>10</sub>[Total HIV DNA] in decreasing order from the  
 657 top left hand corner. The size and colour of each circle corresponds to the correlation coefficient  
 658 between any two variables. Correlation coefficients were calculated using the Spearman method  
 659 with pairwise complete observations; only correlations significant at a 0.05 level are shown (other  
 660 boxes are left blank). Green boxes enclose variables which have a significant correlation with 1  
 661 year log<sub>10</sub> [Total HIV DNA] at a 0.05 level. Abbreviations: CM, central memory; EM, effector  
 662 memory.



663 **Figure 4.** Immunologic and clinical variables which relate to baseline total HIV DNA

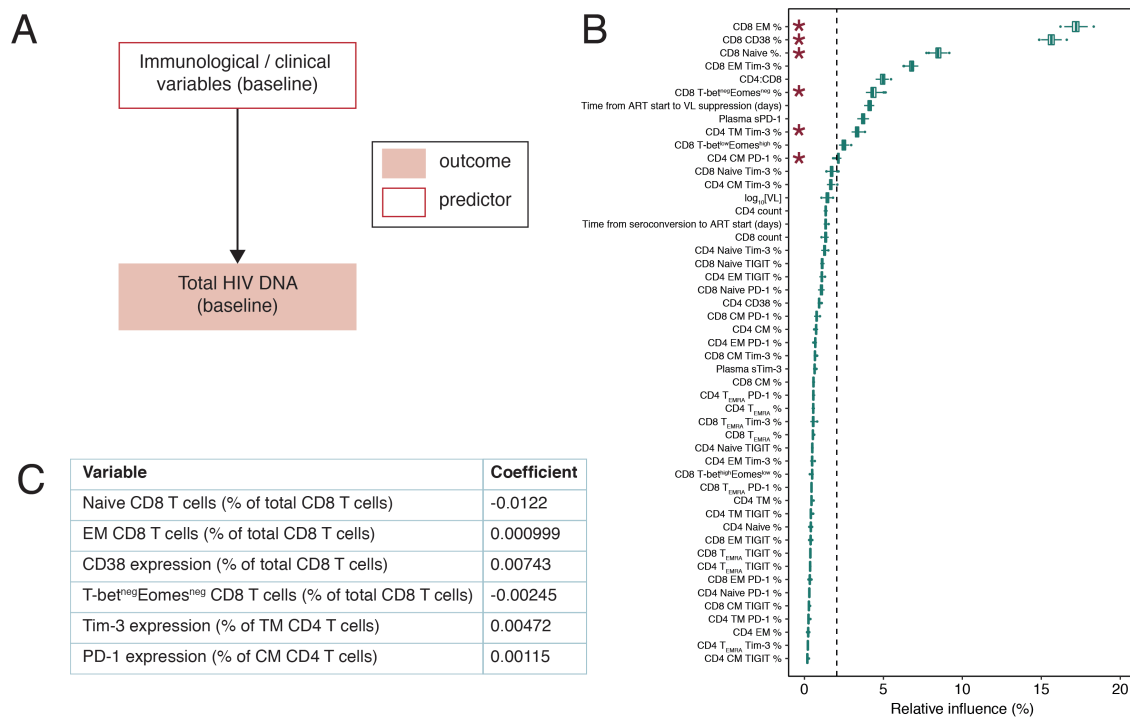

664

665 **(A)** Structure for models shown in B and C. **(B)** Boosted regression tree model to assess  
 666 predictors of baseline total HIV DNA (49 predictors, n=62); boxplots show the summary of 100  
 667 model runs. Influential predictors were defined as those whose relative contribution was greater  
 668 than 100 divided by the total number of covariates, this value is indicated by the dashed vertical  
 669 line. Variables which were also selected in C are marked with an asterisk. **(C)** Least absolute  
 670 shrinkage and selection operator (LASSO) output for predictors of baseline total HIV DNA (49  
 671 predictors, n=59, deviance explained 0.67). Variables which do not significantly contribute to the  
 672 model have a coefficient of zero; only those with a non-zero coefficient are shown. Missing  
 673 values were imputed for individuals with some but not all immunologic measures available.

674 **Figure 5.** Relationship between HLA class I alleles and total HIV DNA at 1 year post-  
675 ART initiation

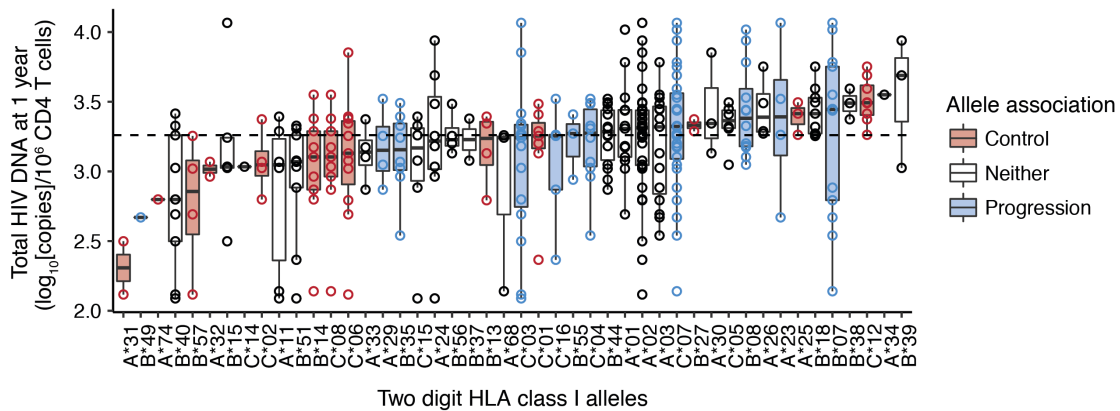

676

677 Relationship between HLA class I alleles and total HIV DNA at 1 year post-ART initiation.  
678 Alleles, shown on the x-axis, are ordered based on the median value of total HIV DNA for all  
679 individuals possessing that allele. Boxplots show the distribution of total HIV DNA in amongst  
680 individuals possessing that allele, and each observation is shown as an open circle. Data is shown  
681 for 61 individuals and a total of 333 alleles. For one individual only B alleles were available and  
682 are included here; similarly for another individual only A and C alleles were available. Where  
683 individuals were homozygous for a given allele, this is only shown once. The dashed line shows  
684 the median value of total HIV DNA for the entire cohort. Alleles were classified as being  
685 associated with disease progression (blue) or control (red), or neither (white), based on those  
686 identified in the International HIV Controllers Study at a significance level of 0.05 (34).

687 **Figure 6.** Model for factors which influence reservoir size in treated PHI

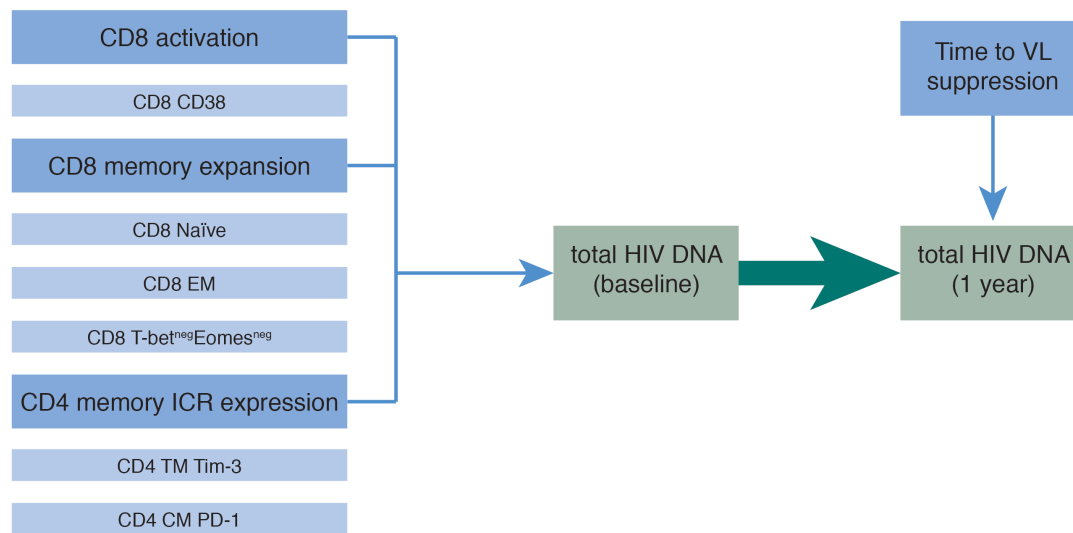

688

689 **Tables**

690 **Table 1.** Demographic and clinical characteristics of participants

|                                                                            |                    |
|----------------------------------------------------------------------------|--------------------|
| Sex                                                                        |                    |
| • Male                                                                     | 63 (100%)          |
| Age (years)                                                                | 36 [28 - 41]       |
| Time between date of confirmed HIV+ test and ART initiation (days)         | 29 [14 - 46]       |
| Time between estimated date of seroconversion and ART initiation (days)    | 49 [33 - 90]       |
| Time between ART initiation and first VL <50 copies/ml (days) <sup>A</sup> | 133 [93 - 241]     |
| Baseline CD4 T cell count (cells/ $\mu$ L) <sup>B</sup>                    | 527 [406 - 645]    |
| Baseline CD8 T cell count (cells/ $\mu$ L) <sup>B</sup>                    | 1033 [831 - 1326]  |
| Baseline CD4 to CD8 ratio <sup>B</sup>                                     | 0.52 [0.37 - 0.76] |
| Baseline viral load (log <sub>10</sub> copies[HIV RNA]/ml)                 | 5.5 [4.6 - 6.5]    |
| Method for diagnosing primary HIV infection                                |                    |
| • Antigen positive (p24 or PCR) but antibody negative                      | 26 (41%)           |
| • Rising antibody titre                                                    | 1 (1.5%)           |
| • Negative test within 6 months of positive test                           | 30 (48%)           |
| • Recent incidence testing algorithm                                       | 6 (9.5%)           |
| Mode of acquisition                                                        |                    |
| • MSM                                                                      | 56 (89%)           |
| • MSW                                                                      | 1 (1.5%)           |
| • Unknown/unrecorded                                                       | 6 (9.5%)           |
| Initial ART regimen                                                        |                    |
| • Unknown/unrecorded                                                       | 3 (4.8%)           |
| <i>Backbone</i>                                                            |                    |
| • tenofovir containing                                                     | 55 (87%)           |
| • abacavir containing                                                      | 5 (7.9%)           |
| <i>Additional agent(s)</i>                                                 |                    |
| • protease inhibitor                                                       | 36 (57%)           |
| • NNRTI                                                                    | 11 (17%)           |
| • integrase inhibitor                                                      | 12 (19%)           |
| • protease inhibitor + integrase inhibitor                                 | 1 (1.5%)           |

691

692 Demographic and baseline clinical characteristics of included participants from the HEATHER  
693 cohort. Values given represent n (%) for categorical variables and median (interquartile range) for  
694 continuous variables. Abbreviations: MSM, men who have sex with men; MSW, men who have  
695 sex with women, NNRTI, non-nucleoside reverse-transcriptase inhibitor.  
696 <sup>A</sup> 60/63 individuals were virologically suppressed to <50 copies/ml by 1 year visit  
697 <sup>B</sup> Data available for 62/63 individuals

698 **Table 2.** Predictors of reservoir size at one year

|                                              | Model A                                                                          | Model B                                                   |
|----------------------------------------------|----------------------------------------------------------------------------------|-----------------------------------------------------------|
| Predictors included                          | Baseline clinical and immunological variables (including baseline total HIV DNA) | 1 year immunological variables and baseline total HIV DNA |
|                                              | <i>Coefficient</i>                                                               | <i>Coefficient</i>                                        |
| Baseline log <sub>10</sub> [total HIV DNA]   | 0.339                                                                            | 0.311                                                     |
| Time from ART start to VL suppression (days) | 0.000342                                                                         | -                                                         |

699

700 Least absolute shrinkage and selection operator (LASSO) output for predictors of reservoir size  
701 (total HIV DNA at 1 year). Model A includes all baseline clinical and immunological variables,  
702 including baseline total HIV DNA (50 predictors, n=60, deviance explained 0.58). Model B  
703 includes all immunological measures at 1 year along with baseline total HIV DNA (1 year; 44  
704 predictors, n=61, deviance explained 0.47). Variables which do not significantly contribute to the  
705 model have a coefficient of zero; only those with a non-zero coefficient are shown. Missing  
706 values were imputed for individuals with some but not all immunologic measures available.

707 **Supplementary Materials**

708 Supplementary Figure 1 - Viral load sampling frequency

709 Supplementary Figure 2 – Reservoir size at 3 years post-ART initiation

710 Supplementary Figure 3 – Missing immunological and clinical data

711 Supplementary Figure 4 – Boosted regression tree results to assess the relative influence  
712 of predictors of reservoir size at 1 year

713 Supplementary Table 1 – LASSO models using data without imputation
